# Supplementary material for: Increased cholinergic contractions of jejunal smooth muscle caused by a high cholesterol diet are prevented by the 5-HT4agonist – tegaserod
Source: Springer Nature journal article supplement (doi:10.1186/1471-230x-6-8), 2006-02-23

## Nicotinic Receptor Blockade

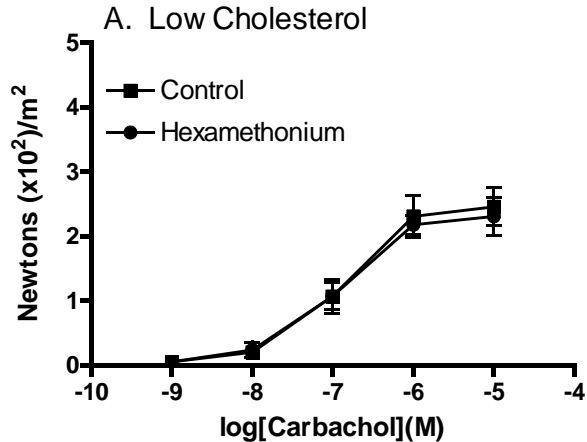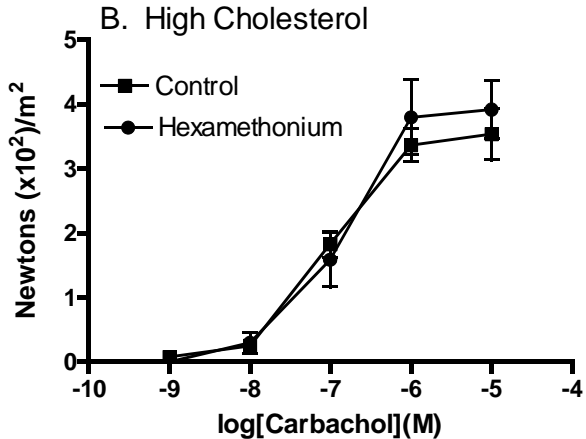

Supplement: 12876_2005_152_MOESM3_ESM.pdf [file 12876_2005_152_MOESM3_ESM.pdf]
