# Supplementary material for: Increased cholinergic contractions of jejunal smooth muscle caused by a high cholesterol diet are prevented by the 5-HT4agonist – tegaserod
Source: Springer Nature journal article supplement (doi:10.1186/1471-230x-6-8), 2006-02-23

# Ileal Responses

A. Diet

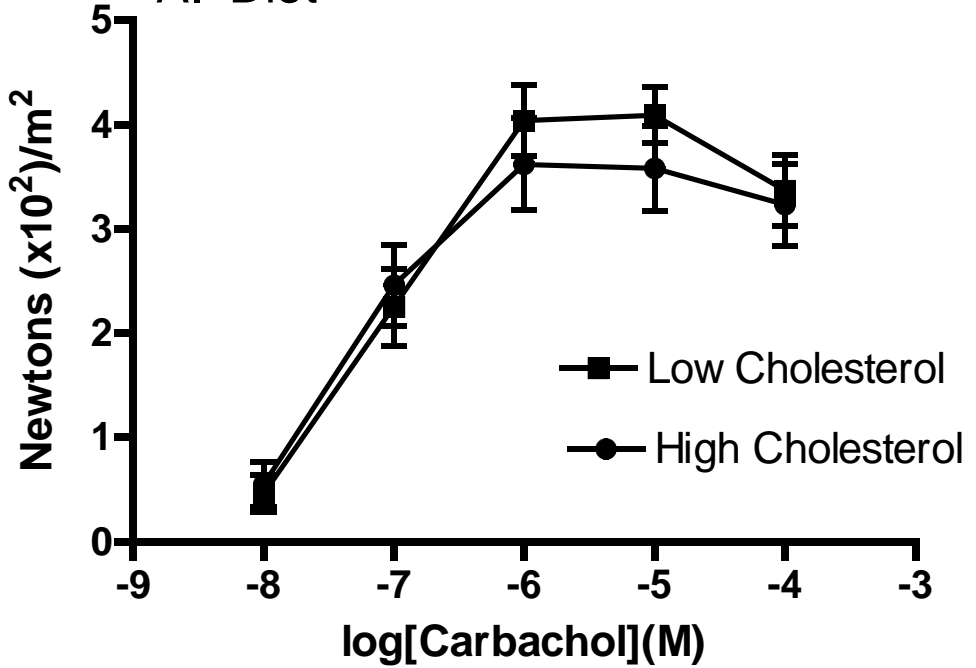

B. TTX & High Cholesterol

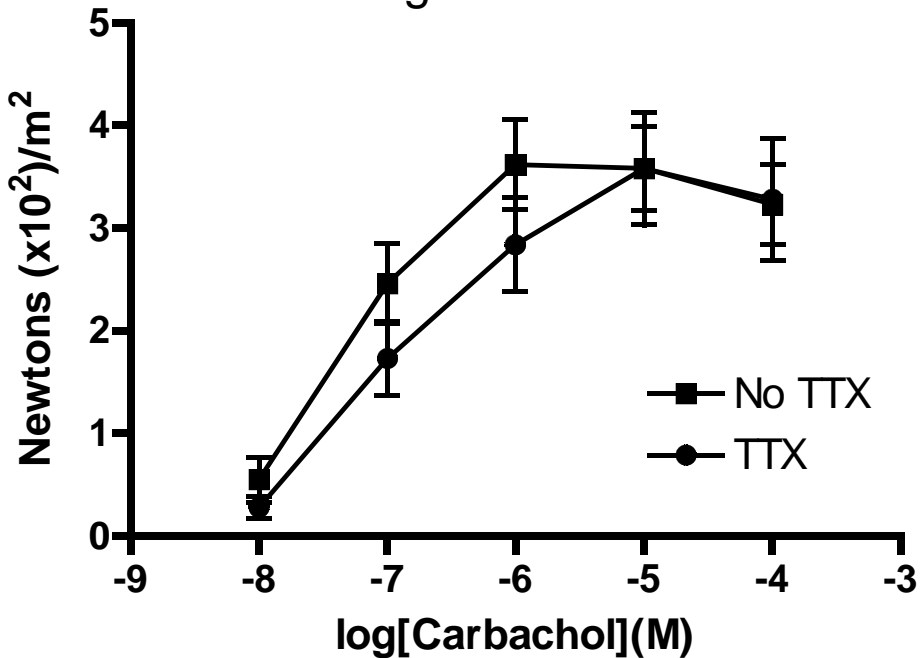

Supplement: 12876_2005_152_MOESM4_ESM.pdf [file 12876_2005_152_MOESM4_ESM.pdf]
